# Supplementary material for: Introgression Among Cultivated and Wild Grapevine in Tuscany
Source: Front Plant Sci. 2020 Feb 28;11:202. doi: 10.3389/fpls.2020.00202 (PMC7058638; doi:10.3389/fpls.2020.00202)
Supplement: TABLE S2 — SNPs missing rate and heterozygosity of single genotypes and various populations (the European–American groups include the hybrid ‘Isabel’ and the hybrid ‘Seibel 128’ identified among the putative sylvestris); SNPs ancestry values for genetic groups inferred by STRUCTURE analysis on 13080 SNPs (SNPs-B matrix) including 37 sylvestris, 70 sativa, 3 non-vinifera, and 4 non-Vitis reference genotypes. [file Table_2.XLSX]

## Sheet: Table S2
num	accessions ID	genotype	specie	identity1 parent-offspring2 full-siblings3	failed SNPs1	% failed SNPs	Ho	ancestry
								Syl	ItaSat	FraSat	MusSat	noVin
1	Sat_1	Moscato Alchi	Vitis vinifera subsp sativa		144	0.825309	43.0247	0	0.365333	0.141667	0.463667	0.0293333
2	Sat_2	Ciliegiolo	Vitis vinifera subsp sativa		174	0.997249	42.3411	0	0	0	1	0
3	Sat_3	Gradino	Vitis vinifera subsp sativa		265	1.5188	44.608	0.000333333	0.705	0.177333	0.116	0.00166667
4	Sat_4	San Lorenzo	Vitis vinifera subsp sativa		337	1.93145	43.6853	0.0963333	0.64	0.262667	0	0.000666667
5	Sat_5	Uva Reina	Vitis vinifera subsp sativa		146	0.836772	44.5382	0.137	0.553333	0.104667	0.201333	0.00333333
6	Sat_6	Barsaglina	Vitis vinifera subsp sativa		129	0.73934	45.6839	0.114333	0.543333	0.129333	0.212667	0.000333333
7	Sat_7	Greco bianco	Vitis vinifera subsp sativa		164	0.939936	44.0523	0.445	0.327333	0.0516667	0.175333	0.000333333
8	Sat_8	Carignano	Vitis vinifera subsp sativa		161	0.922742	44.357	0	0.796333	0.000333333	0.188667	0.0146667
9	Sat_9	Grechetto bianco	Vitis vinifera subsp sativa		149	0.853966	44.1933	0.0733333	0.693333	0.000333333	0.223333	0.00966667
10	Sat_10	Malvasia Istriana	Vitis vinifera subsp sativa		263	1.50734	43.1888	0.00133333	0.617667	0.171	0.189667	0.0203333
11	Sat_11	Fortana	Vitis vinifera subsp sativa		129	0.73934	44.6504	0.0776667	0.658333	0.100333	0.163333	0.000333333
12	Sat_12	Cabernet franc	Vitis vinifera subsp sativa		154	0.882623	45.0387	0.360667	0.500667	0.106	0.0323333	0.000666667
13	Sat_13	Vernaccia di S. Gimignano	Vitis vinifera subsp sativa		157	0.899817	44.4451	0.001	0.776667	0.013	0.204333	0.00466667
14	Sat_14	Chardonnay	Vitis vinifera subsp sativa		167	0.95713	45.0958	0	0	1	0	0
15	Sat_15	Malvasia nera di Brindisi	Vitis vinifera subsp sativa		285	1.63343	42.9004	0.000333333	0.756667	0.00333333	0.238333	0.00166667
16	Sat_16	Malvasia di Candia aromatica	Vitis vinifera subsp sativa		140	0.802384	43.4597	0.054	0.481	0.218	0.246333	0.000666667
17	Sat_17	Sylvaner verde	Vitis vinifera subsp sativa		137	0.78519	44.7403	0	0.128333	0.803333	0.068	0.000333333
18	Sat_18	Teroldego	Vitis vinifera subsp sativa		255	1.46149	44.8438	0.221	0.383333	0.320333	0.0753333	0.000333333
19	Sat_19	Gamay	Vitis vinifera subsp sativa		128	0.733608	44.1628	0.000333333	0.084	0.915333	0	0.000333333
20	Sat_20	Marinello	Vitis vinifera subsp sativa		127	0.727877	45.9846	0.131667	0.611	0.142	0.114667	0.000666667
21	Sat_21	Luadca	Vitis vinifera subsp sativa		126	0.722146	43.8633	0.0723333	0.653	0.108667	0.165667	0.000333333
22	Sat_22	Malvasia bianca di Candia	Vitis vinifera subsp sativa		144	0.825309	44.0823	0.00666667	0.965667	0.00166667	0.0246667	0.00166667
23	Sat_23	Schiava	Vitis vinifera subsp sativa		116	0.664833	45.1362	0.000666667	0.476333	0.302333	0.204	0.0166667
24	Sat_24	Lugliesa toscana	Vitis vinifera subsp sativa		130	0.745071	44.5952	0.00333333	0.466667	0.261667	0.242667	0.0253333
25	Sat_25	Semillion	Vitis vinifera subsp sativa		225	1.28955	44.7135	0.000333333	0.359333	0.00133333	0.637667	0.000666667
26	Sat_26	Rossara toscana	Vitis vinifera subsp sativa		100	0.573132	44.9735	0.0376667	0.469	0.191667	0.301333	0.000333333
27	Sat_27	Bonamico	Vitis vinifera subsp sativa		146	0.836772	43.5441	0.00433333	0.641667	0.139	0.214	0.000666667
28	Sat_28	Bianca la tinta	Vitis vinifera subsp sativa		135	0.773728	45.746	0.0873333	0.325	0.011	0.576333	0
29	Sat_29	Prugolino	Vitis vinifera subsp sativa		150	0.859697	44.0456	0.000333333	0.91	0.0316667	0.0566667	0.001
30	Sat_30	Sauvignon rosso	Vitis vinifera subsp sativa		160	0.917011	44.0305	0	0	0	1	0
31	Sat_31	Sangiovese	Vitis vinifera subsp sativa		176	1.00871	45.1019	0.0373333	0	0.000333333	0.962333	0
32	Sat_32	Malvasia bianca lunga	Vitis vinifera subsp sativa		344	1.97157	43.2238	0	0.728	0.000333333	0.263667	0.00833333
33	Sat_33	Sanforte	Vitis vinifera subsp sativa		140	0.802384	45.2045	0.035	0.627333	0.00433333	0.333	0.000333333
34	Sat_34	Canaiolo nero	Vitis vinifera subsp sativa		149	0.853966	43.6326	0.0363333	0.820333	0.0356667	0.107333	0.000333333
35	Sat_35	Carraresa	Vitis vinifera subsp sativa		155	0.888354	44.4689	0.093	0.712	0.0586667	0.122667	0.013
36	Sat_36	Vermentino nero	Vitis vinifera subsp sativa		177	1.01444	44.236	0.002	0.909	0.000333333	0.088	0.000333333
37	Sat_37	Alicante Bouschet	Vitis vinifera subsp sativa		171	0.980055	44.0759	0	0.539	0.162	0.261333	0.0373333
38	Sat_38	Petit Manseng	Vitis vinifera subsp sativa		194	1.11188	43.7116	0.555	0	0.444667	0	0
39	Sat_39	Refosco dal peduncolo rosso	Vitis vinifera subsp sativa		377	2.16071	44.9183	0.217	0.463	0.228	0.092	0.000333333
40	Sat_40	Mammolo	Vitis vinifera subsp sativa		148	0.848235	44.2832	0.0336667	0.475	0.0216667	0.469	0
41	Sat_41	Roussane	Vitis vinifera subsp sativa		179	1.02591	44.6117	0.209	0.511	0.173667	0.104	0.002
42	Sat_42	Moscato violetto	Vitis vinifera subsp sativa		266	1.52453	43.7551	0	0.13	0.000333333	0.869333	0
43	Sat_43	Viognier	Vitis vinifera subsp sativa		418	2.39569	45.0382	0.211333	0.496667	0.265667	0.0266667	0
44	Sat_44	Trebbiano toscano	Vitis vinifera subsp sativa		171	0.980055	44.6084	0	0.992667	0.000333333	0.007	0
45	Sat_45	Syrah	Vitis vinifera subsp sativa		300	1.71939	45.6788	0.280333	0.348	0.329	0.042	0
46	Sat_46	Aleatico	Vitis vinifera subsp sativa		278	1.59331	43.1275	0	0.391667	0.112333	0.495	0.000666667
47	Sat_47	Colorino	Vitis vinifera subsp sativa		158	0.905548	43.1637	0.293667	0.624667	0.0383333	0.0423333	0.00133333
48	Sat_48	Petit Verdot	Vitis vinifera subsp sativa		190	1.08895	45.6078	0.543333	0.186	0.253333	0.017	0.000333333
49	Sat_49	Marselan	Vitis vinifera subsp sativa		223	1.27808	46.0377	0.0796667	0.477	0.362667	0.0723333	0.00866667
50	Sat_50	Traminer aromatico	Vitis vinifera subsp sativa		140	0.802384	45.0601	0.000333333	0	0.999667	0	0
51	Sat_51	Montepulciano	Vitis vinifera subsp sativa		187	1.07176	43.6417	0.0283333	0.793333	0.000333333	0.175333	0.00233333
52	Sat_52	Mourvedre	Vitis vinifera subsp sativa		163	0.934204	44.8944	0.0506667	0.570667	0.13	0.218	0.0306667
53	Sat_53	Orpicchio	Vitis vinifera subsp sativa		380	2.1779	44.3051	0.00566667	0.624667	0.250333	0.119	0.000333333
54	Sat_54	Manzoni bianco	Vitis vinifera subsp sativa		150	0.859697	41.9066	0	0	0.999333	0	0
55	Sat_55	Colombana bianca	Vitis vinifera subsp sativa		242	1.38698	42.8862	0	0.491333	0	0.508333	0
56	Sat_56	Caloria	Vitis vinifera subsp sativa		123	0.704952	45.645	0.0153333	0.611333	0.055	0.317667	0.000333333
57	Sat_57	Schiava nera toscana	Vitis vinifera subsp sativa		137	0.78519	44.6421	0.084	0.788667	0.104	0.0226667	0.000333333
58	Sat_58	Sauvignon blanc	Vitis vinifera subsp sativa		139	0.796653	47.1547	0.008	0.311	0.670667	0.01	0.000333333
59	Sat_59	Merlot	Vitis vinifera subsp sativa		191	1.09468	44.0807	0.198333	0.389333	0.300333	0.112	0.000333333
60	Sat_60	Riesling Italico	Vitis vinifera subsp sativa		240	1.37552	45.9321	0.156	0.439333	0.352333	0.0516667	0.000333333
61	Sat_61	Lupeccio	Vitis vinifera subsp sativa		177	1.01444	43.0375	0.000333333	0.680667	0.01	0.305333	0.00433333
62	Sat_62	Vermentino	Vitis vinifera subsp sativa		248	1.42137	43.7791	0.072	0.649	0.148667	0.128667	0.00133333
63	Sat_63	Moscato bianco	Vitis vinifera subsp sativa		185	1.06029	42.8952	0	0.183	0.194	0.622333	0.000333333
64	Sat_64	Cabernet Sauvignon	Vitis vinifera subsp sativa		154	0.882623	45.3105	0.175333	0.416667	0.407667	0	0.000333333
65	Sat_65	Moscato nero di Aqui	Vitis vinifera subsp sativa		138	0.790922	45.1358	0.000666667	0.431333	0.24	0.327667	0.000333333
66	Sat_66	Garofana	Vitis vinifera subsp sativa		190	1.08895	43.6377	0	0.553333	0.00133333	0.444667	0.000333333
67	Sat_67	Ansonica	Vitis vinifera subsp sativa		148	0.848235	43.948	0.00633333	0.688333	0.031	0.247333	0.0266667
68	Sat_68	Durella gentile	Vitis vinifera subsp sativa		116	0.664833	45.1939	0.154	0.603	0.0763333	0.166	0.000333333
69	Sat_69	Pinot noir	Vitis vinifera subsp sativa		148	0.848235	46.3757	0	0	1	0	0
70	Sat_70	Ribolla gialla	Vitis vinifera subsp sativa		138	0.790922	44.5176	0.011	0.628667	0.202	0.146667	0.0113333
71	Syl_1		Vitis vinifera subsp sylvestris		204	1.16919	37.5551	0.999667	0	0	0	0
72	Syl_2		Vitis vinifera subsp sylvestris		258	1.47868	37.7371	0.999333	0	0	0	0
73	Syl_3		European-American Vitis hybrid	Seibel 1281	280	1.60477	43.8024	0	0.261667	0.185667	0.118667	0.434
74	Syl_4		Vitis vinifera subsp sylvestris	Syl_73	205	1.17492	38.5954	0.958	0	0.0416667	0	0
75	Syl_5		Vitis vinifera subsp sylvestris		349	2.00023	36.9027	0.940667	0.028	0.004	0.0223333	0.00433333
76	Syl_7		Vitis vinifera subsp sylvestris	Syl_43	193	1.10614	40.4752	0.88	0.0546667	0.0643333	0.000333333	0.000333333
77	Syl_10		sativa-sylvestris cross	Trebbiano T.2 (Sat_44)	215	1.23223	44.7223	0.410667	0.513667	0.000333333	0.0753333	0
78	Syl_12		Vitis vinifera subsp sylvestris		220	1.26089	39.1746	0.884	0.0186667	0.00166667	0.094	0.002
79	Syl_16		sativa-sylvestris cross	Sangiovese2 (Sat_31)	155	0.888354	44.0236	0.003	0.297667	0.00133333	0.698	0.000333333
80	Syl_17		Vitis vinifera subsp sylvestris		387	2.21802	38.0517	0.927667	0.07	0.000333333	0.001	0.001
81	Syl_18		Vitis vinifera subsp sylvestris		224	1.28381	40.9022	0.888667	0.0576667	0.049	0.004	0.000666667
82	Syl_21		Vitis vinifera subsp sylvestris		213	1.22077	39.4256	0.873667	0.0796667	0.045	0.000333333	0.001
83	Syl_23		Vitis vinifera subsp sylvestris		214	1.2265	39.5671	0.896667	0.056	0.046	0.001	0.000666667
84	Syl_25		Vitis vinifera subsp sylvestris		174	0.997249	40.286	0.827667	0.09	0.051	0.031	0.000333333
85	Syl_26		sativa-sylvestris cross	Sangiovese2 (Sat_31)	157	0.899817	45.2027	0.552	0	0.000333333	0.447333	0
86	Syl_27		sativa-sylvestris cross	Negretta2	173	0.991518	42.2981	0.654333	0.176333	0.0566667	0.112333	0.000333333
87	Syl_28		Vitis vinifera subsp sylvestris		180	1.03164	40.3521	0.893	0.0603333	0.0413333	0.00533333	0.000333333
88	Syl_32		Vitis vinifera subsp sylvestris		220	1.26089	40.3529	0.882333	0.0373333	0.048	0.032	0.000666667
89	Syl_35		Vitis vinifera subsp sylvestris		188	1.07749	40.0637	0.838667	0.143	0.00466667	0.013	0.000333333
90	Syl_36		Vitis vinifera subsp sylvestris		297	1.7022	39.8577	0.831667	0.0816667	0.0753333	0.0103333	0.000333333
91	Syl_37		Vitis vinifera subsp sylvestris		209	1.19785	39.4744	0.877667	0.0853333	0.029	0.00766667	0.000333333
92	Syl_41		Vitis vinifera subsp sylvestris		189	1.08322	39.9096	0.813	0.181333	0.001	0.00433333	0.000333333
93	Syl_42		Vitis vinifera subsp sylvestris		232	1.32967	38.7372	0.926667	0.000666667	0.0436667	0.0256667	0.003
94	Syl_45		Vitis vinifera subsp sylvestris		403	2.30972	39.7947	0.852333	0.0253333	0.109	0.0126667	0.000666667
95	Syl_47		Vitis vinifera subsp sylvestris		196	1.12334	38.0304	0.94	0.000666667	0.059	0	0.000333333
96	Syl_48		Vitis vinifera subsp sylvestris	Syl_493	187	1.07176	39.8702	0.925333	0.0723333	0.002	0	0.000333333
97	Syl_49		Vitis vinifera subsp sylvestris	Syl_632; Syl_483	204	1.16919	39.4282	0.933667	0.000333333	0.0653333	0	0.000333333
98	Syl_54		Vitis vinifera subsp sylvestris	Syl_612	210	1.20358	38.2817	0.932333	0	0.0426667	0.0213333	0.00333333
99	Syl_55		Vitis vinifera subsp sativa	Bellone1	152	0.87116	43.8425	0.000666667	0.707667	0.00133333	0.289667	0.000333333
100	Syl_56		Vitis vinifera subsp sylvestris	Isabel2 (noVin_1)	383	2.19509	43.0941	0.499333	0.00233333	0.294667	0.007	0.196667
101	Syl_60		Vitis vinifera subsp sativa	Regina dei vigneti1	149	0.853966	43.6846	0	0.511667	0.147333	0.340333	0.000333333
102	Syl_62		Vitis vinifera subsp sylvestris	Lambrusque Ibardin1	226	1.29528	38.2186	0.930333	0	0.0693333	0	0
103	Syl_64		Vitis vinifera subsp sylvestris		202	1.15773	39.2381	0.929667	0.000666667	0.000666667	0.068	0.000333333
104	Syl_65		Vitis vinifera subsp sylvestris		233	1.3354	38.9834	0.953667	0	0.002	0.044	0.000333333
105	Syl_66		Vitis vinifera subsp sylvestris		199	1.14053	38.4602	0.999333	0	0	0	0
106	Syl_69		sativa-sylvestris cross	Bellone2 (Syl_55)	185	1.06029	44.9285	0.152667	0.436333	0.08	0.331	0.000333333
107	Syl_70		Vitis vinifera subsp sylvestris		203	1.16346	39.9826	0.924	0.00566667	0.002	0.0683333	0.000333333
108	noVin_1	Isabel	American-European Vitis hybryd		277	1.58757	44.3655	0	0.065	0.489333	0.000333333	0.445
109	noVin_2	Riparia Gloire de Montpellier	Vitis riparia		1429	8.19005	26.6995	0	0	0	0	1
110	noVin_3	Rupestris du Lot	Vitis rupestris		901	5.16392	28.0353	0	0	0	0	1
111	noVin_4	Vitis rotundifolia	Vitis rotundifolia		3595	20.6041	26.2831	0	0	0	0	1
112	noVin_5	Cissus rhombifolia	Cissus rhombifolia		9562	54.8028	26.3125	0	0	0	0	1
113	noVin_6	Cayratia japonica	Cayratia japonica		12113	69.4234	23.8988	0.136333	0.176333	0.00133333	0.11	0.576667
114	noVin_7	Leea guineensis	Leea guineensis		13703	78.5362	26.3551	0.174667	0.206	0.00533333	0.150333	0.463333
